# Supplementary material for: Distinct Polymorphisms in HLA Class I Molecules Govern Their Susceptibility to Peptide Editing by TAPBPR
Source: PubMed Central journal article supplement (PMC7057265; doi:10.1016/j.celrep.2019.09.074), 2019-11-05
Supplement: mmc1.pdf [file mmc1.pdf]

**Cell Reports, Volume 29**

**Supplemental Information**

**Distinct Polymorphisms in HLA Class I  
Molecules Govern Their Susceptibility  
to Peptide Editing by TAPBPR**

**F. Tudor Ilca, Linnea Z. Drexhage, Gemma Brewin, Sarah Peacock, and Louise H. Boyle**

## Supplementary information

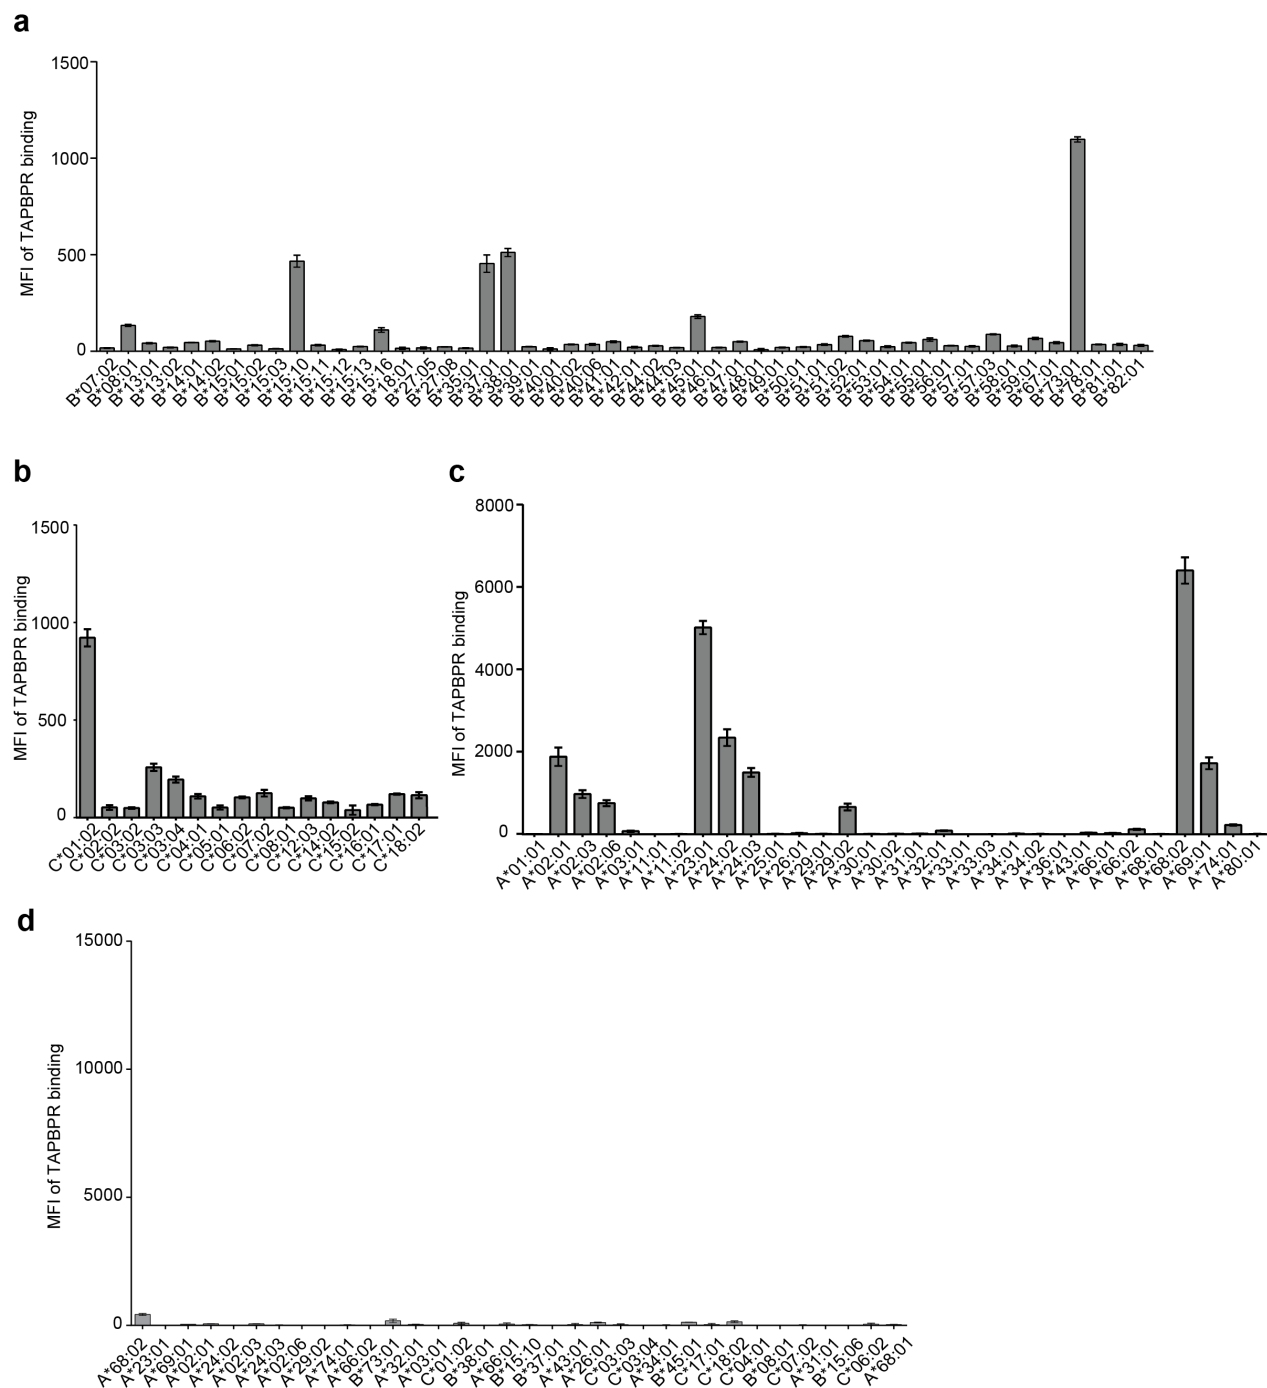

**Figure S1. TAPBPR binding to HLA-B and -C molecules on the single HLA beads, Related to Figure 1.** Bar graphs showing soluble TAPBPR binding to (a) HLA-B and (b) HLA-C molecules, upon treatment with 1  $\mu$ M TAPBPR, to (c) HLA-A molecules treated with 100 nM TAPBPR and (d) with 1  $\mu$ M TN5 TAPBPR mutant to the top 34 HLA I binders to WT TAPBPR, as shown in **figure 1b**, using the SAB library. The SABs were treated with TAPBPR for 1 h at 22°C. The data including error bars was generated based on triplicates within one experiment. This is a representative example of three independent experiments.

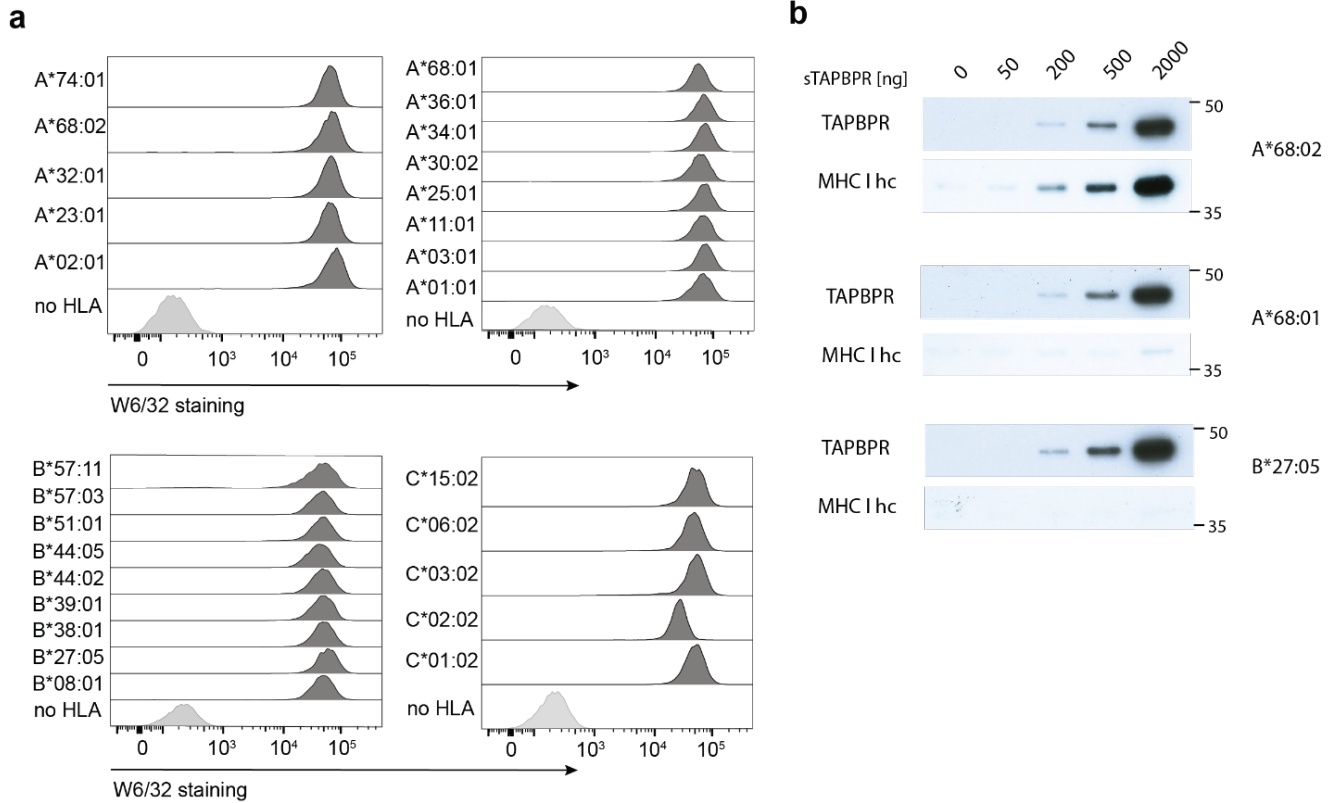

**Figure S2. Levels of cell surface MHC class I molecules for individual HLA I alleles, Related to Figure 2 and Figure 3.** (a) Histograms showing MHC class I levels detected with W6/32 antibody for each HLA I molecule transduced into HeLaM-HLA-ABC<sup>KO</sup> cells (dark grey filled histograms). A light grey filled histogram was included for non-transduced HeLaM-HLA-ABC<sup>KO</sup> cells. This is a representative example of three independent experiments. (b) Western blot analysis on recombinant TAPBPR pull-downs, when recombinant TAPBPR was titrated, on cells expressing A\*68:02, A\*68:01 or B\*27:05. Membranes were probed for MHC I heavy chain (using HC10) and TAPBPR, as indicated. This is a representative experiment of two independent repeats.

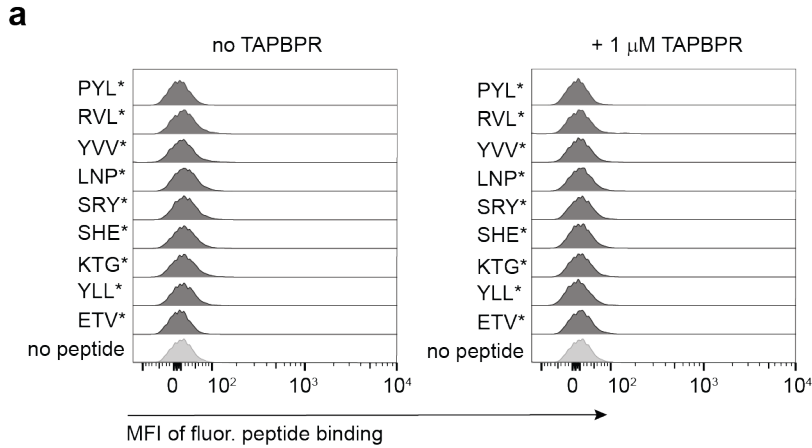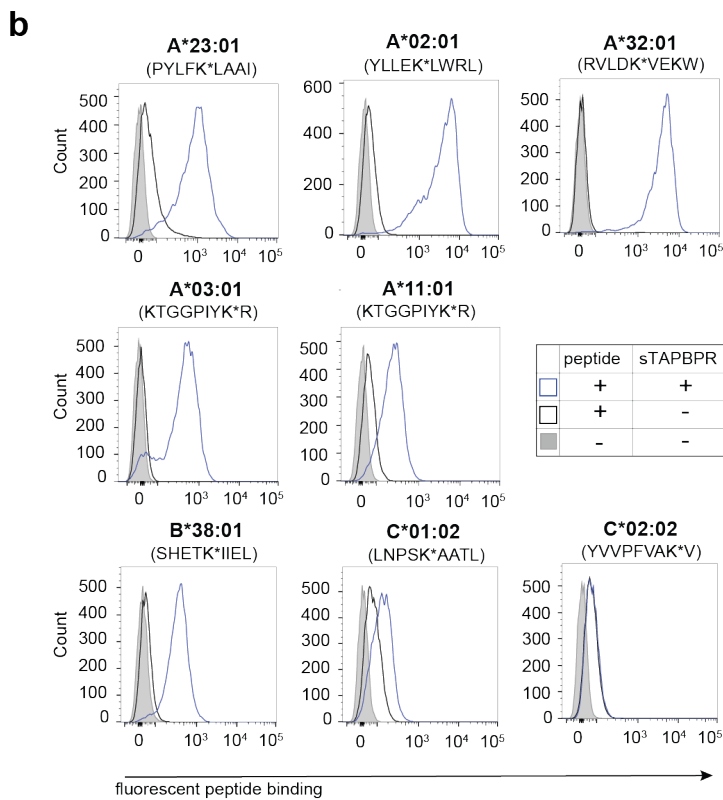

**Figure S3. None of the peptides bind to HeLaM cells lacking classical HLA I molecules, Related to Figure 4.**

**(a)** Histograms showing binding levels of the fluorescent peptides used in **figure 4c** to HeLaM-HLA-ABC<sup>KO</sup> cells, in the presence (right) or absence (left) of 1  $\mu$ M TAPBPR. Cells were treated with TAPBPR for 15 min at 37°C, then peptide was added for 1 h at 37°C. The peptides tested were: ETVSK\*QSNV (ETV\*), YLLEK\*LWRL (YLL\*), KTGGPIYK\*R (KTG\*), SHETK\*IIEL (SHE\*), SRYWK\*IRTR (SRY\*), LNPSK\*AATL (LNP\*), YVVPFVAK\*V (YVV\*), RVLDK\*VEKW (RVL\*) and PYLFK\*LAAI (PYL\*). **(b)** Histograms showing the level of fluorescent peptide bound to individual HLA I-expressing cells, additional to the ones depicted in **figure 4b**, either untreated (filled grey line), treated with peptide alone (black line) or with peptide and TAPBPR (blue line). These histograms are representative of three independent experiments.

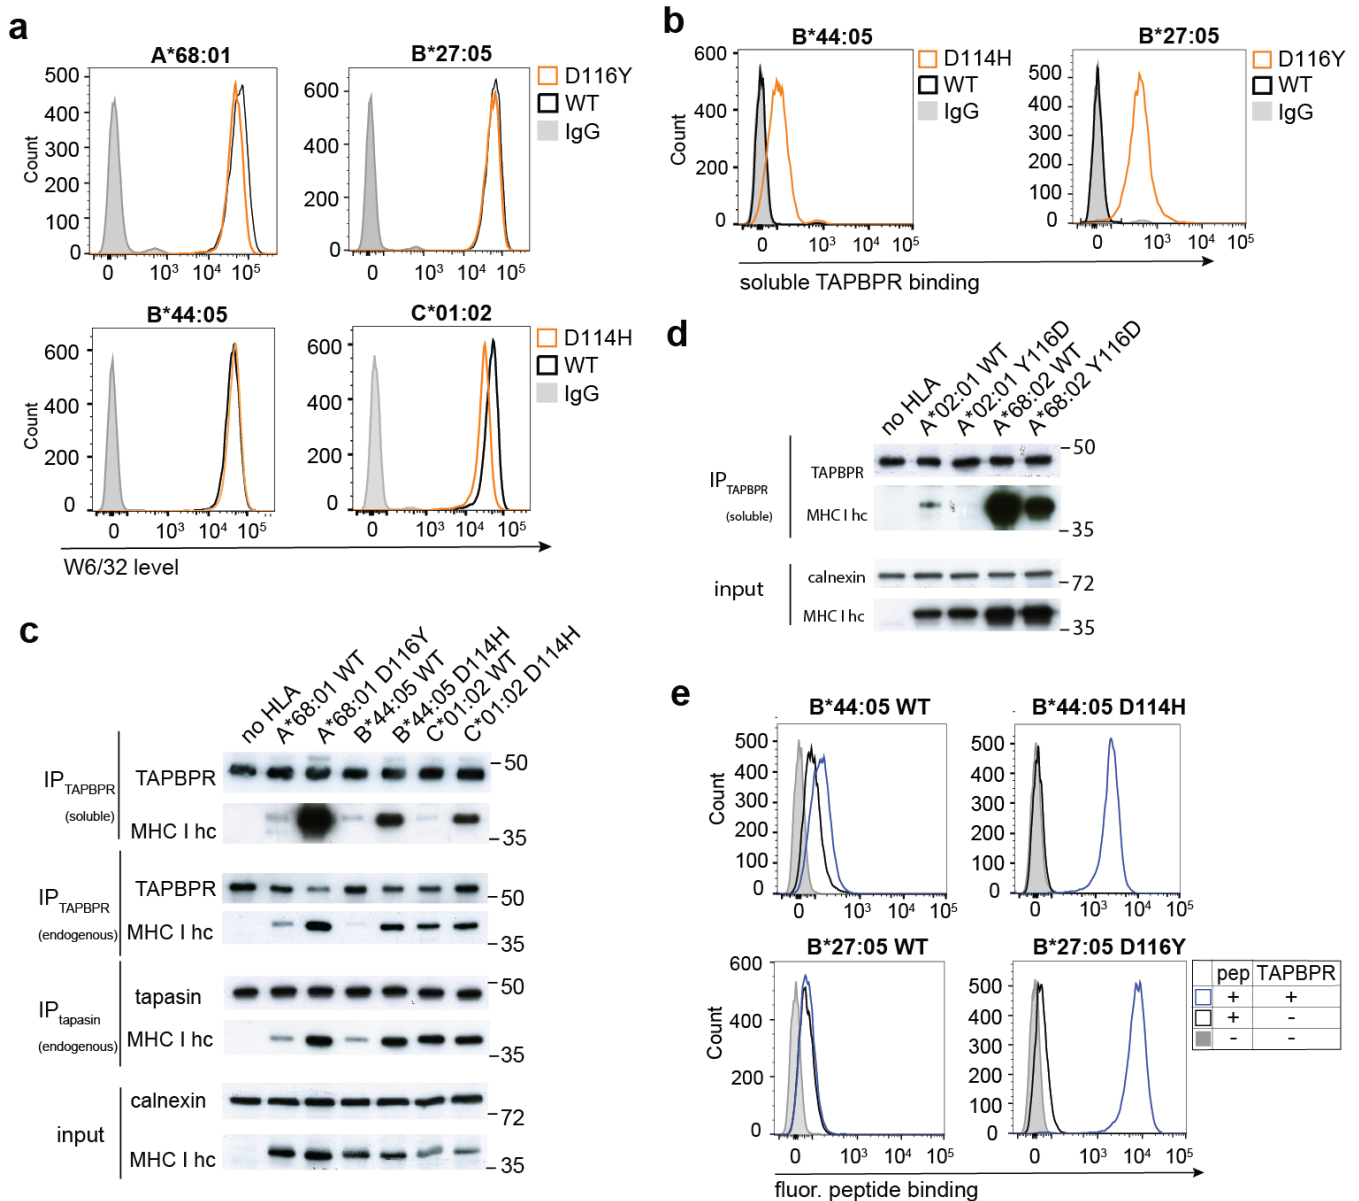

**Figure S4. Disrupting the F pocket architecture impairs HLA I binding to TAPBPR, Related to Figure 6.** (a) Histograms showing surface expression levels of A\*68:01, B\*27:05, B\*44:05 and C\*01:02 (black lines), compared to their corresponding F pocket mutants (orange lines). (b) Histograms showing the level of bound TAPBPR to cell surface B\*44:05 or B\*27:05 (black lines), as well as to their corresponding F pocket mutants (orange lines). Untreated cells are included as a negative control (solid grey line). (c) Western blot analysis on recombinant TAPBPR pull-downs (top) and endogenous TAPBPR and tapasin immunoprecipitates (bottom), on cells expressing A\*68:01<sup>WT</sup>, A\*68:01<sup>D116Y</sup>, B\*44:05<sup>WT</sup>, B\*44:05<sup>D114H</sup>, C\*01:02<sup>WT</sup> and C\*01:02<sup>D114H</sup> and on (d) recombinant TAPBPR pull-downs on cells expressing A\*02:01, A\*68:02, as well as their Y116D mutants. Membranes were probed for MHC I heavy chain, TAPBPR, tapasin, and calnexin, as indicated. (e) Histograms showing the level of bound fluorescent peptides (top) EFGK\*AFSF to cells expressing either B\*44:05<sup>WT</sup> or B\*44:05<sup>D114H</sup>, and (bottom) SRYWK\*IRTR to cells expressing either B\*27:05<sup>WT</sup> or B\*27:05<sup>D116Y</sup>, when cells were incubated with peptide alone (black line) or with peptide and 1  $\mu$ M TAPBPR (blue line); an untreated sample was included as a negative control (solid grey line).

**a**

|                |                                                                                                          |    |     |     |     |
|----------------|----------------------------------------------------------------------------------------------------------|----|-----|-----|-----|
|                | 72                                                                                                       | 97 | 114 | 116 | 120 |
| <b>A*68:02</b> | Q T D R V D L G T L R G Y Y N Q S E A G S H T I Q R M Y G C D V G P D G R F L R G Y <b>H Q Y</b> A Y D G |    |     |     |     |
| B*27:05        | -----R--LR-----L-N-----L----- <b>D</b> ----                                                              |    |     |     |     |
| B*27:09        | -----R--LR-----L-N-----L----- <b>H</b> ----                                                              |    |     |     |     |
| B*35:01        | --Y-ES-RNLR-----I-----L-----L--- <b>HD-S</b> ----                                                        |    |     |     |     |
| B*35:03        | --Y-ES-RNLR-----I-----L-----L--- <b>HD-F</b> ----                                                        |    |     |     |     |

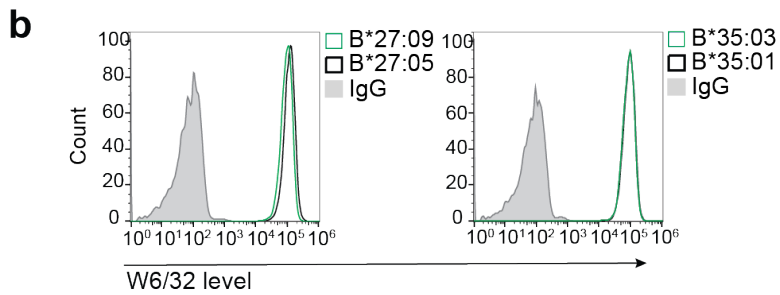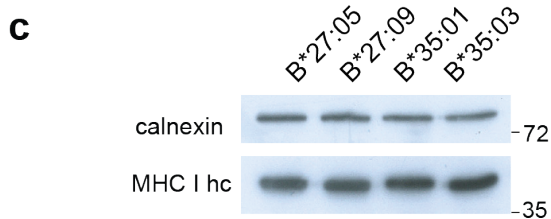

**Figure S5. Expression of HLA-B molecules with natural polymorphisms at residue 116, Related to Figure 6.** (a) Amino acid sequence alignment comparing residues 72-120 of A\*68:02 with the HLA I pairs B\*27:05 - B\*27:09 and B\*35:01 - B\*35:03; residues 114 and 116 are highlighted in red. (b) Histograms showing the surface expression levels of the HLA-B molecules listed in (a), detected with W6/32 antibody. (c) Western blot analysis of the expression levels of HLA I molecules in whole cell lysates (a). Membranes were probed for MHC I heavy chain and calnexin, as indicated. These experiments are representative examples of three independent repeats.

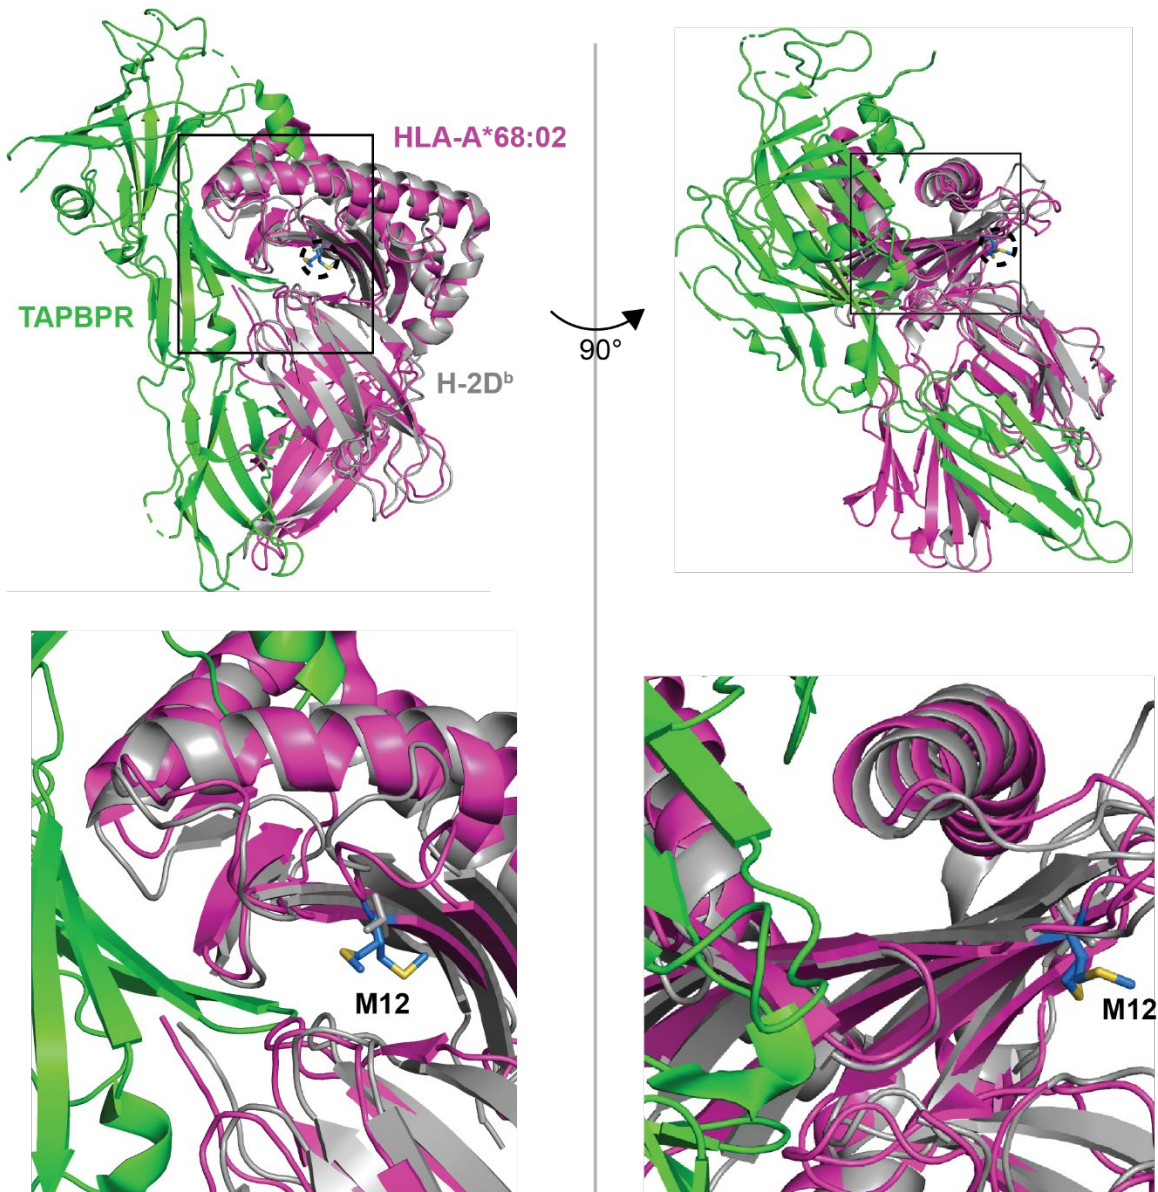

**Figure S6. Residue M12 of HLA-A\*68:02 does not appear to directly interact with TAPBPR, Related to Figure 7.** PyMOL figure of the structure of HLA-A\*68:02 folded with peptide SVYDFFVWL (pink) (PDB ID 4HX1) overlaid onto the structure of the H-2D<sup>b</sup>:TAPBPR complex (grey and green respectively) (PDB ID 5OPI), depicted from different angles. Residue M12 of HLA-A\*68:02 is colored in blue and highlighted in a dotted circle. Magnified selected areas are depicted below the whole structures. Residue M12 was captured in two different orientations in the crystal structure of HLA-A\*68:02.

**Table S1. MHC class I levels on single antigen HLA beads detected using W6/32, Related to Figure 1.**

| HLA allele | Bead # | MHC class I levels | HLA allele | Bead # | MHC class I levels | HLA allele | Bead # | MHC class I levels |
|------------|--------|--------------------|------------|--------|--------------------|------------|--------|--------------------|
| A*01:01    | 3      | 18527              | B*13:01    | 97     | 18064              | B*51:02    | 66     | 18795              |
| A*02:01    | 4      | 19739              | B*13:02    | 36     | 19727              | B*52:01    | 67     | 17497              |
| A*02:03    | 5      | 18974              | B*14:01    | 37     | 19502              | B*53:01    | 68     | 18690              |
| A*02:06    | 6      | 18702              | B*14:02    | 38     | 17233              | B*54:01    | 69     | 19465              |
| A*03:01    | 7      | 19116              | B*15:01    | 40     | 19608              | B*55:01    | 70     | 19803              |
| A*11:01    | 8      | 18910              | B*15:02    | 41     | 19350              | B*56:01    | 71     | 19119              |
| A*11:02    | 9      | 19415              | B*15:03    | 42     | 19668              | B*57:01    | 72     | 18956              |
| A*23:01    | 10     | 19552              | B*15:10    | 43     | 20197              | B*57:03    | 73     | 19594              |
| A*24:02    | 11     | 19068              | B*15:11    | 98     | 17639              | B*58:01    | 74     | 18524              |
| A*24:03    | 12     | 17692              | B*15:12    | 44     | 19294              | B*59:01    | 75     | 18090              |
| A*25:01    | 13     | 19499              | B*15:13    | 45     | 19296              | B*67:01    | 76     | 19989              |
| A*26:01    | 14     | 18366              | B*15:16    | 46     | 18461              | B*73:01    | 77     | 19542              |
| A*29:01    | 15     | 19014              | B*18:01    | 47     | 19915              | B*78:01    | 78     | 17716              |
| A*29:02    | 17     | 18142              | B*27:05    | 16     | 19969              | B*81:01    | 79     | 18679              |
| A*30:01    | 18     | 17818              | B*27:08    | 48     | 19129              | B*82:01    | 80     | 17708              |
| A*30:02    | 19     | 17921              | B*35:01    | 49     | 19066              | C*01:02    | 81     | 18988              |
| A*31:01    | 20     | 18716              | B*37:01    | 50     | 18551              | C*02:02    | 82     | 16840              |
| A*32:01    | 21     | 19548              | B*38:01    | 51     | 18845              | C*03:02    | 83     | 18982              |
| A*33:01    | 22     | 18132              | B*39:01    | 52     | 20136              | C*03:03    | 84     | 19000              |
| A*33:03    | 100    | 18062              | B*40:01    | 53     | 19119              | C*03:04    | 85     | 18943              |
| A*34:01    | 23     | 19320              | B*40:02    | 54     | 19336              | C*04:01    | 86     | 12491              |
| A*34:02    | 24     | 19845              | B*40:06    | 99     | 18638              | C*05:01    | 87     | 19122              |
| A*36:01    | 25     | 17031              | B*41:01    | 55     | 20023              | C*06:02    | 88     | 16573              |
| A*43:01    | 26     | 18328              | B*42:01    | 56     | 20116              | C*07:02    | 89     | 18133              |
| A*66:01    | 27     | 18555              | B*44:02    | 57     | 17659              | C*08:01    | 90     | 19692              |
| A*66:02    | 28     | 19088              | B*44:03    | 58     | 18984              | C*12:03    | 91     | 20447              |
| A*68:01    | 29     | 19016              | B*45:01    | 59     | 19214              | C*14:02    | 92     | 17786              |
| A*68:02    | 30     | 17506              | B*46:01    | 63     | 19173              | C*15:02    | 93     | 21276              |
| A*69:01    | 31     | 18749              | B*47:01    | 61     | 17077              | C*16:01    | 94     | 14783              |
| A*74:01    | 32     | 19216              | B*48:01    | 62     | 19200              | C*17:01    | 95     | 14369              |
| A*80:01    | 33     | 18535              | B*49:01    | 60     | 19506              | C*18:02    | 96     | 18683              |
| B*07:02    | 34     | 20419              | B*50:01    | 64     | 19141              |            |        |                    |
| B*08:01    | 35     | 20346              | B*51:01    | 65     | 19516              |            |        |                    |



**Table S2. Characterization of HLA-A molecules subjected to TAPBPR binding using the single antigen HLA beads, Related to Figure 5.**

| HLA allomorph  | Supertype  | F pocket specificity | Residue 114 | Residue 116 |
|----------------|------------|----------------------|-------------|-------------|
| <b>A*68:02</b> | <b>A2</b>  | <b>Hydrophobic</b>   | <b>H</b>    | <b>Y</b>    |
| <b>A*23:01</b> | <b>A24</b> | <b>Hydrophobic</b>   | <b>H</b>    | <b>Y</b>    |
| <b>A*69:01</b> | <b>A2</b>  | <b>Hydrophobic</b>   | <b>H</b>    | <b>Y</b>    |
| <b>A*02:01</b> | <b>A2</b>  | <b>Hydrophobic</b>   | <b>H</b>    | <b>Y</b>    |
| <b>A*24:02</b> | <b>A24</b> | <b>Hydrophobic</b>   | <b>H</b>    | <b>Y</b>    |
| <b>A*02:06</b> | <b>A2</b>  | <b>Hydrophobic</b>   | <b>H</b>    | <b>Y</b>    |
| A*03:01        | A3         | Basic                | R           | D           |
| A*01:01        | A1         | Aromatic             | R           | D           |
| A*26:01        | A1         | Aromatic             | Q           | D           |
| A*30:01        | A3         | Basic / Aromatic     | E           | H           |
| A*30:02        | A1         | Aromatic             | E           | H           |
| A*33:01        | A3         | Basic                | Q           | D           |
| A*36:01        | A3         | Basic                | R           | D           |
| A*66:01        | A3         | Basic                | Q           | D           |
| A*68:01        | A3         | Basic                | R           | D           |

- strong TAPBPR binders are highlighted in bold

**Table S3: Primers used for cloning the MHC class I mutants, Related to STAR Methods.**

| Primer name     | Sequence 5'-3'       |
|-----------------|----------------------|
| B2705_D116Y_Fwd | GTACCACCAGTACGCCTACG |
| B2705_D116Y_Rev | CGTAGGCGTACTGGTGGTAC |
| B4405_D114H_Fwd | CGCGGGTATCATCAGTACGC |
| B4405_D114H_Rev | GCGTACTGATGATACCCGCG |
| C0102_D114H_Fwd | GCGGGTATCACCAGTACGC  |
| C0102_D114H_Rev | GCGTACTGGTGATACCCGCG |
| A0201_V12M_Fwd  | CACATCCATGTCCCGGCC   |
| A0201_V12M_Rev  | GGCCGGGACATGGATGTG   |
| A0201_S105P_Fwd | GACGTGGGGCCGGACTGG   |
| A0201_S105P_Rev | CCAGTCCGGCCCCACGTC   |
| A6802_M12V_Fwd  | CTACACTTCCGTGTCCCGGC |
| A6802_M12V_Rev  | GCCGGGACACGGAAGTGTAG |
| A6802_P105S_Fwd | CGTGGGGTCGGACGGG     |
| A6802_P105S_Rev | CCCGTCCGACCCACG      |
